# Supplementary material
Source: publisher figshare collection journal article supplement (https://tandf.figshare.com/ndownloader/files/13592849)
Supplement: Supplementary file 1 [file 13592849]

**Supplementary Material**

Synthesis and *in vitro* evaluation of antiviral and cytostatic properties of novel 8-triazolyl acyclovir derivatives

Dijana Saftića, Biserka Žinića, Ljubica Glavaš-Obrovacb, Mirosława Studzińskac, Edyta Paradowskac, and Zbigniew J. Leśnikowskic

aDivision of Organic Chemistry and Biochemistry, Ruđer Bošković Institute, Zagreb, Croatia; bDepartment of Chemistry, Biochemistry and Clinical Chemistry, Faculty of Medicine, Osijek, Croatia; cLaboratory of Molecular Virology and Biological Chemistry, Institute of Medical Biology of the Polish Academy of Sciences, Łódź, Poland

*Email:* [*bzinic@irb.hr*](mailto:bzinic@irb.hr)

**Content Page**

1H NMR and 13C NMR spectra for compounds **5**, **10**–**12**  S2–S9

2D NMR – COSY (300 MHz, DMSO-*d*6) spectra of compound **10** S10–S11

2D NMR – NOESY (300 MHz, DMSO-*d*6) spectra of compound **10** S12–S13

General - Cells and viruses S14

Cytotoxic effects of acyclovir and compounds **10**–**12** on HeLa, NCI-H358, Jurkat,

K562, Raji and HuT78 tumor cell lines growth. S15–S17

**Fig. S1**. 1H NMR (300 MHz, DMSO-*d*6) spectrum of compound **5**.

**Fig. S2**. 13C NMR(75 MHz, APT, DMSO-*d*6) spectrum of compound **5**.

**Fig. S3**. 1H NMR (300 MHz, DMSO-*d*6) spectrum of compound **10**.

**Fig. S4**. 13C NMR(75 MHz, APT, DMSO-*d*6) spectrum of compound **10**.

**Fig. S5**. 1H NMR (300 MHz, DMSO-*d*6) spectrum of compound **11**.

**Fig. S6**. 13C NMR(75 MHz, APT, DMSO-*d*6) spectrum of compound **11**.

**Fig. S7**. 1H NMR (300 MHz, DMSO-*d*6) spectrum of compound **12**.

**Fig. S8**. 13C NMR(75 MHz, APT, DMSO-*d*6) spectrum of compound **12**.

**Fig. S9**. 2D NMR – full COSY (300 MHz, DMSO-*d*6) spectrum of compound **10**.





**Fig. S10**. 2D NMR – partial COSY (300 MHz, DMSO-*d*6) spectrum of compound **10** with proton-proton interactions assigned. Marked rectangles correspond to interactions as follows; black CH-5'' ↔ CH2-a, red OH-a ↔ CH2-a, and blue OH-4' ↔ CH2-4').

**
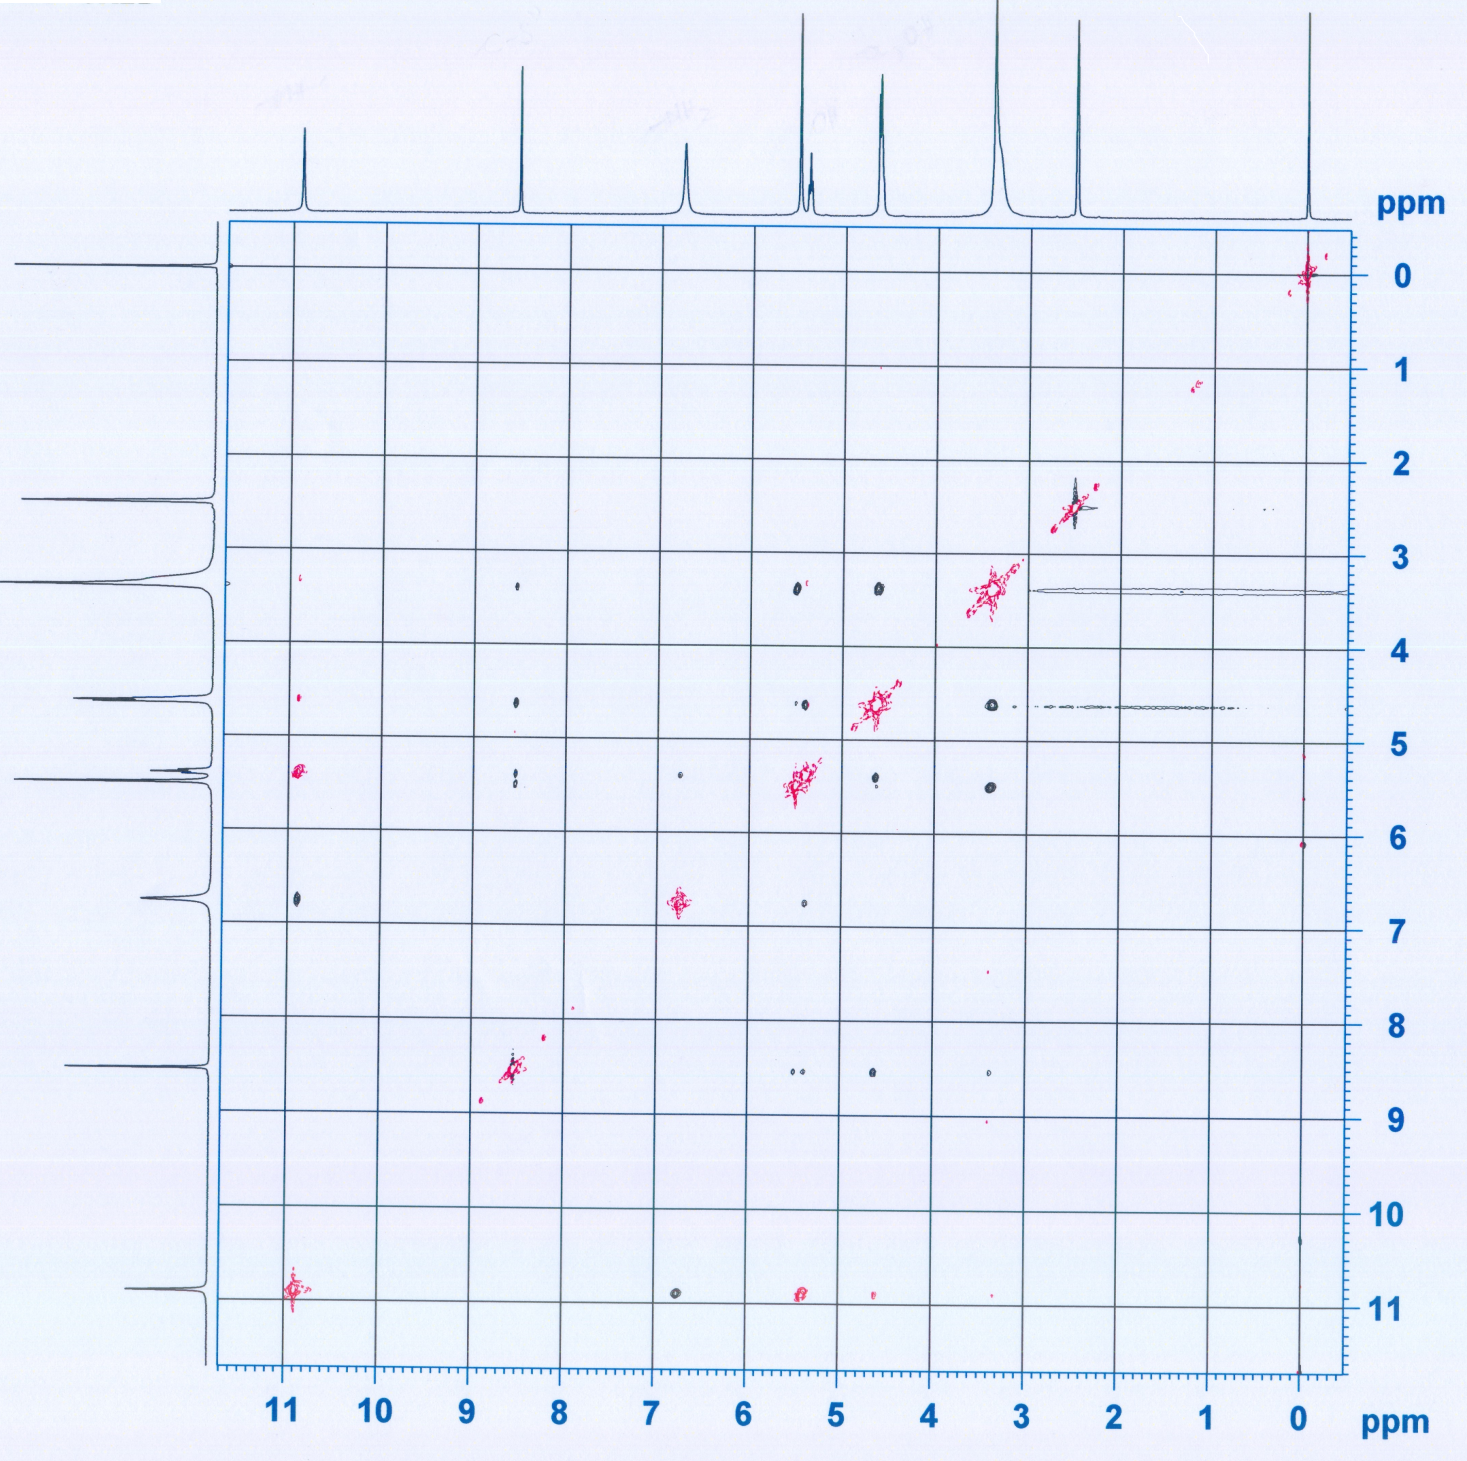
**

**Fig. S11**. 2D NMR – full NOESY (300 MHz, DMSO-*d*6) spectrum of compound **10**.

**
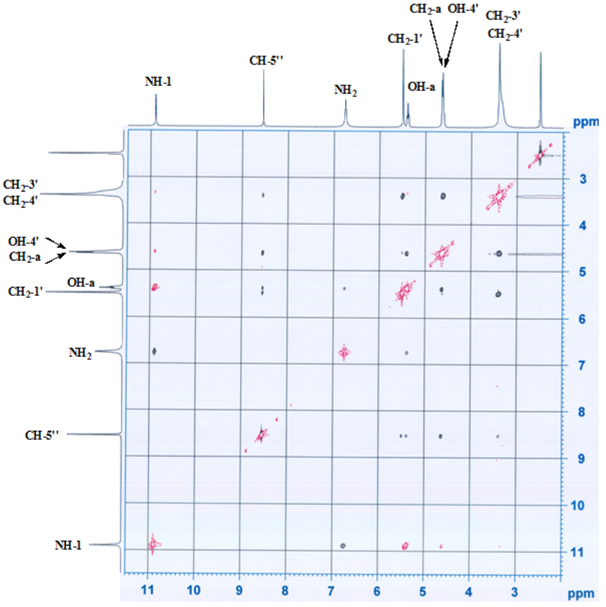
**

**Fig. S12**. 2D NMR – partial NOESY (300 MHz, DMSO-*d*6) spectrum of compound **10** with proton-proton interactions assigned; a) strong: NH-1 ↔ NH2, CH2-1' ↔ CH2-3'(CH2-4'), CH2-a ↔ OH-a, and CH2-4' ↔ OH-4'; b) medium: CH-5'' ↔ CH2-4'(CH2-3'), CH-5'' ↔ CH2-a, CH-5'' ↔ OH-a, and CH-5'' ↔ CH2-1'; c) weak: NH2 ↔ CH2-1' and CH2-1' ↔ CH2-a.

**General**

**Cells and viruses.**

The MRC-5 (ATCC CCL-171; American Type Culture Collection, Rockville, MD), Vero (ATCC CCL-81), LLC-MK2 (ATCC-CCL-7.1) and A549 (ATCC CCL-185) cells were propagated in Eagle's minimal essential medium (EMEM) supplemented with 10% inactivated FBS, 2 × 10–3 mol dm-3, L-glutamine and 100 units/mL penicillin G-100 mg/mL streptomycin (culture medium). The cells were incubated 24 h at 37 oC in a humidified atmosphere containing 5% CO2.42,43

Madine Darby canine kidney cells (MDCK I), cervix adenocarcinoma cells (HeLa), human epithelial colorectal adenocarcinoma cells (CaCo-2) were grown in Dulbecco’s Modified Eagle Medium DMEM (Gibco, EU), supplemented with 10% FBS, 2 × 10–3 mol dm-3 glutamine and 100 U/0.1 mg penicillin/streptomycin; in tissue culture flasks and grown as monolayers. To detach them from the flask surface, cells were trypsinized using a 0.25% trypsin/EDTA solution.

Human caucasian bronchioalveolar carcinoma cells (NCI-H358), human acute T cell leukemia cells (Jurkat), chronic myelogenous leukemia cells (K562), human Burkitt lymphoma cells (Raji) and human T cell lymphoma cells (HuT78) were grown in RPMI 1640 medium (Gibco, EU) supplemented with 10% heat-inactivated fetal bovine serume FBS (Gibco, EU), 2 × 10–3 mol dm-3 glutamine (Gibco, EU), 1 × 10–3 mol dm-3 sodium pyruvate (Gibco, EU), 1 × 10–2 mol dm-3 HEPES (Sigma-Aldrich, USA) and 100 U/0.1 mg penicillin/streptomycin.

The human herpes viruses: HCMV, strain AD-169 (ATCC VR-538)and HSV-1, strain McIntyre (ATCC VR-539), as well as human parainfluenzavirus type 3 (HPIV-3, ATCC VR-93), vesicular stomatitis virus (VSV), and encephalomyocarditis virus(EMCV) were used in reduction assays. Viruses were propagated inEMEM supplemented with 2% of FBS, L-glutamine and antibiotics inthe following cell lines: MRC-5 (HCMV), Vero (HSV-1), LLC-MK2(HPIV-3), L929 (VSV), and A549 (EMCV).

**
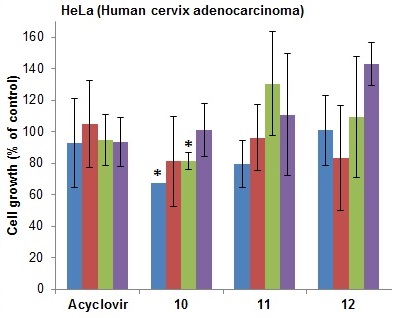
**

**Fig. S13**. Cytotoxic effects of acyclovir and derivatives **10**−**12** on HeLa tumor cell line growth after 72 h of incubation in the final concentration range (
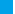
10−4,
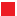
10−5,
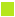
10−6 and
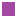
10−7 mol dm-3). Cytotoxicity was analyzed using the MTT survival assay. Data are presented as the mean value ± SD of three independent experiments done in triplicates.


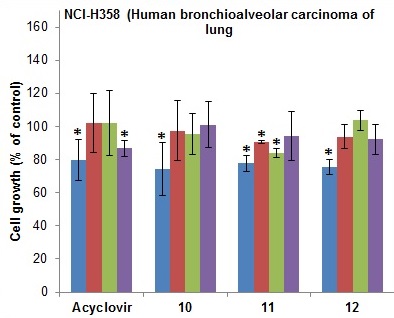


**Fig. S14**. Cytotoxic effects of acyclovir and derivatives **10**−**12** on NCI-H358 tumor cell line growth after 72 h of incubation in the final concentration range (
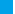
10−4,
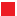
10−5,
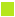
10−6 and
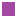
10−7 mol dm-3). Cytotoxicity was analyzed using the MTT survival assay. Data are presented as the mean value ± SD of three independent experiments done in triplicates.


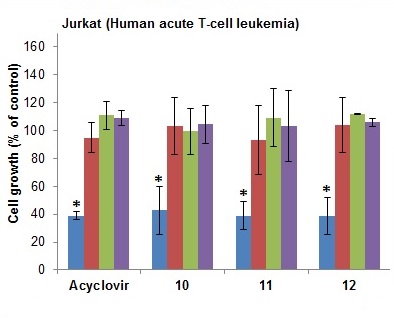


**Fig. S15**. Cytotoxic effects of acyclovir and derivatives **10**−**12** on Jurkat tumor cell line growth after 72 h of incubation in the final concentration range (
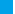
10−4,
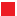
10−5,
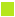
10−6 and
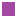
10−7 mol dm-3). Cytotoxicity was analyzed using the MTT survival assay. Data are presented as the mean value ± SD of three independent experiments done in triplicates.


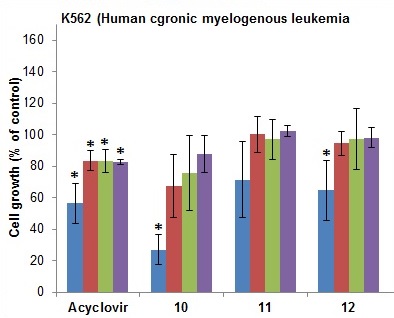


**Fig. S16**. Cytotoxic effects of acyclovir and derivatives **10**−**12** on K562 tumor cell line growth after 72 h of incubation in the final concentration range (
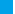
10−4,
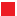
10−5,
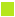
10−6 and
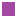
10−7 mol dm-3). Cytotoxicity was analyzed using the MTT survival assay. Data are presented as the mean value ± SD of three independent experiments done in triplicates.


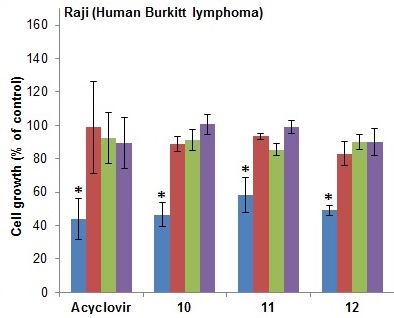


**Fig. S17**. Cytotoxic effects of acyclovir and derivatives **10**−**12** on Raji tumor cell line growth after 72 h of incubation in the final concentration range (
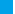
10−4,
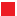
10−5,
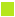
10−6 and
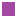
10−7 mol dm-3). Cytotoxicity was analyzed using the MTT survival assay. Data are presented as the mean value ± SD of three independent experiments done in triplicates.


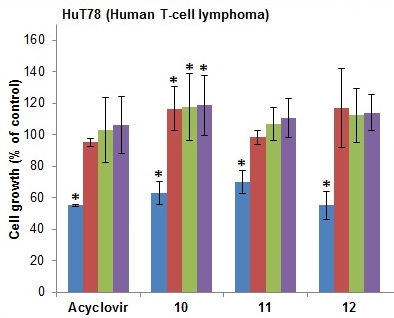


**Fig. S18**. Cytotoxic effects of acyclovir and derivatives **10**−**12** on HuT78 tumor cell line growth after 72 h of incubation in the final concentration range (
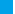
10−4,
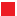
10−5,
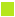
10−6 and
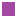
10−7 mol dm-3). Cytotoxicity was analyzed using the MTT survival assay. Data are presented as the mean value ± SD of three independent experiments done in triplicates.
